# Supplementary material
Source: publisher figshare collection journal article supplement (https://gsajournals.figshare.com/ndownloader/files/13843739)
Supplement: Supplementary file 1 [file 13843739]

A

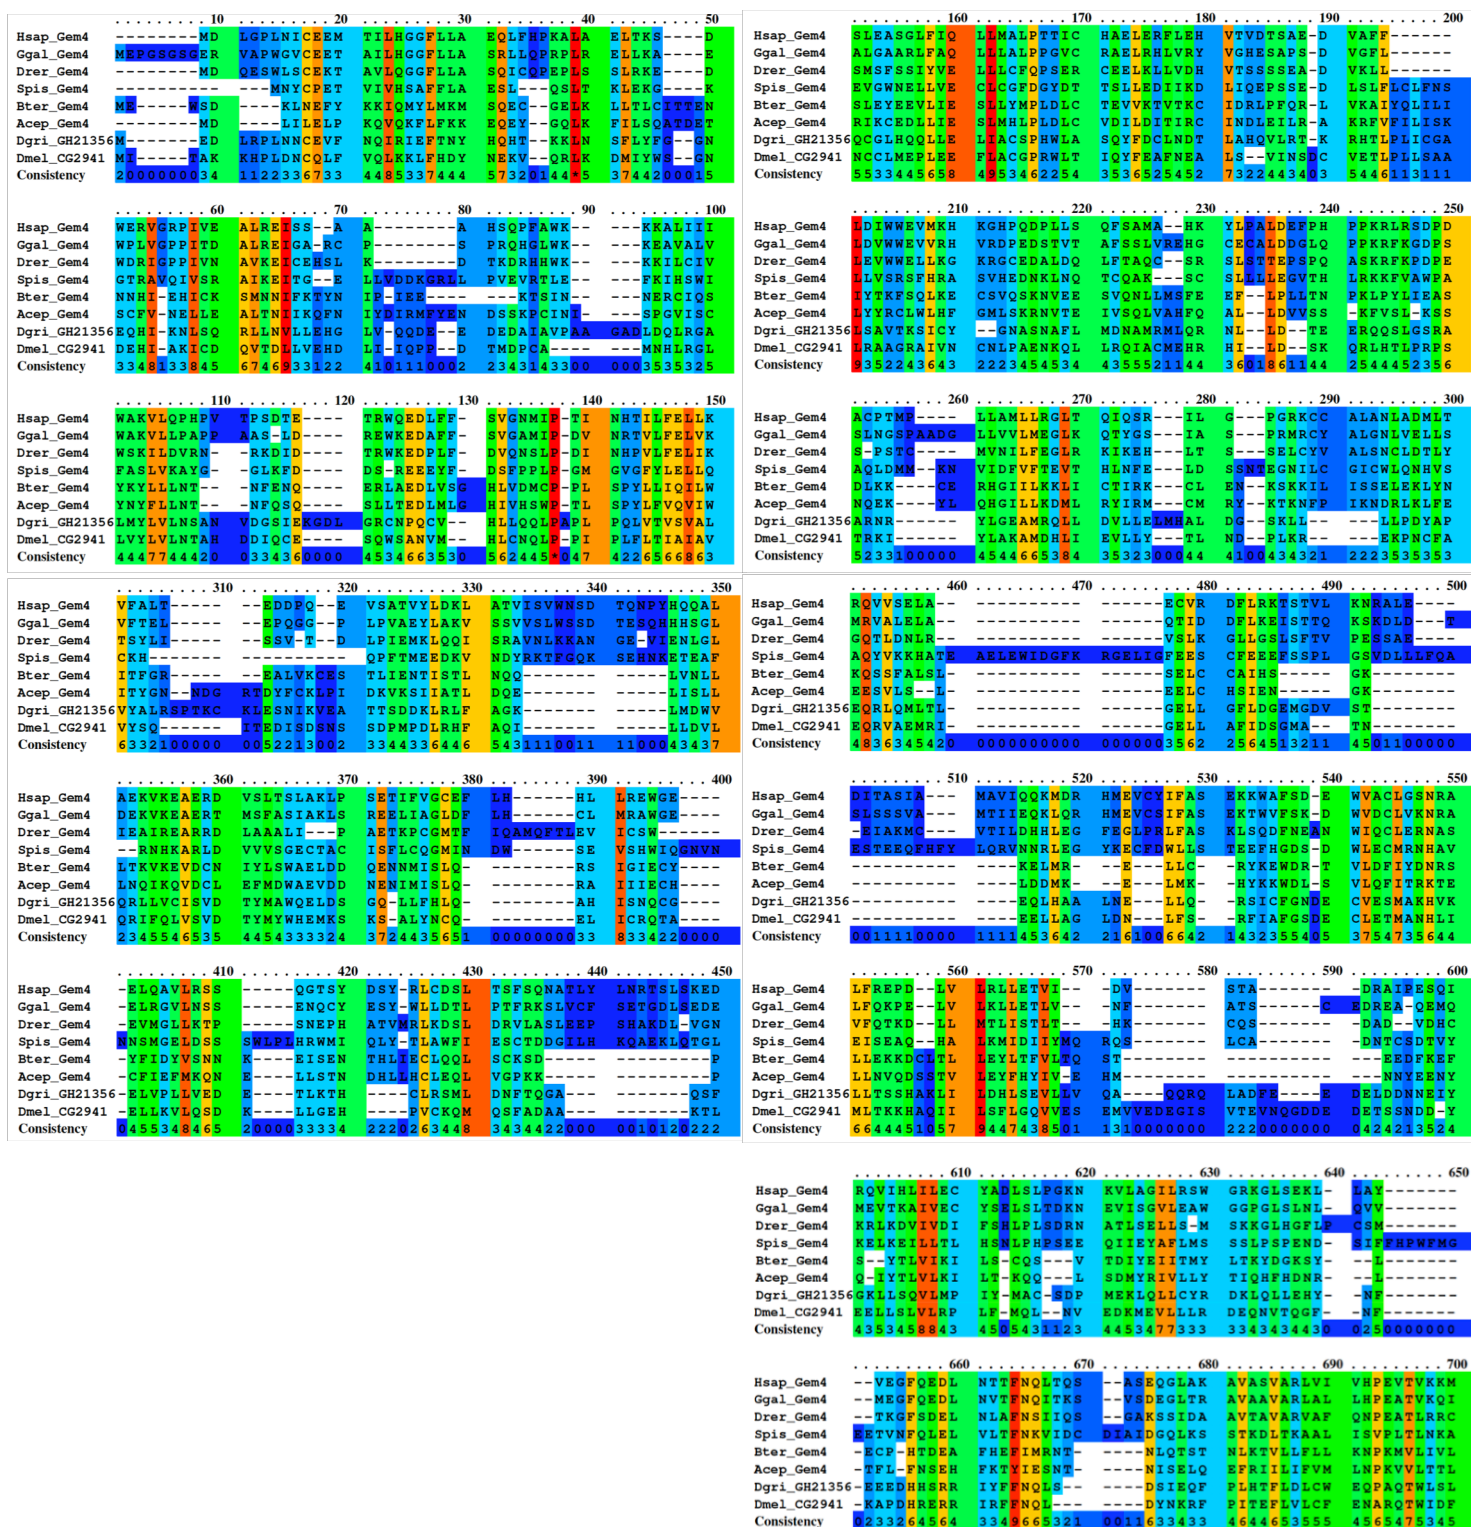

Fig. S1

B

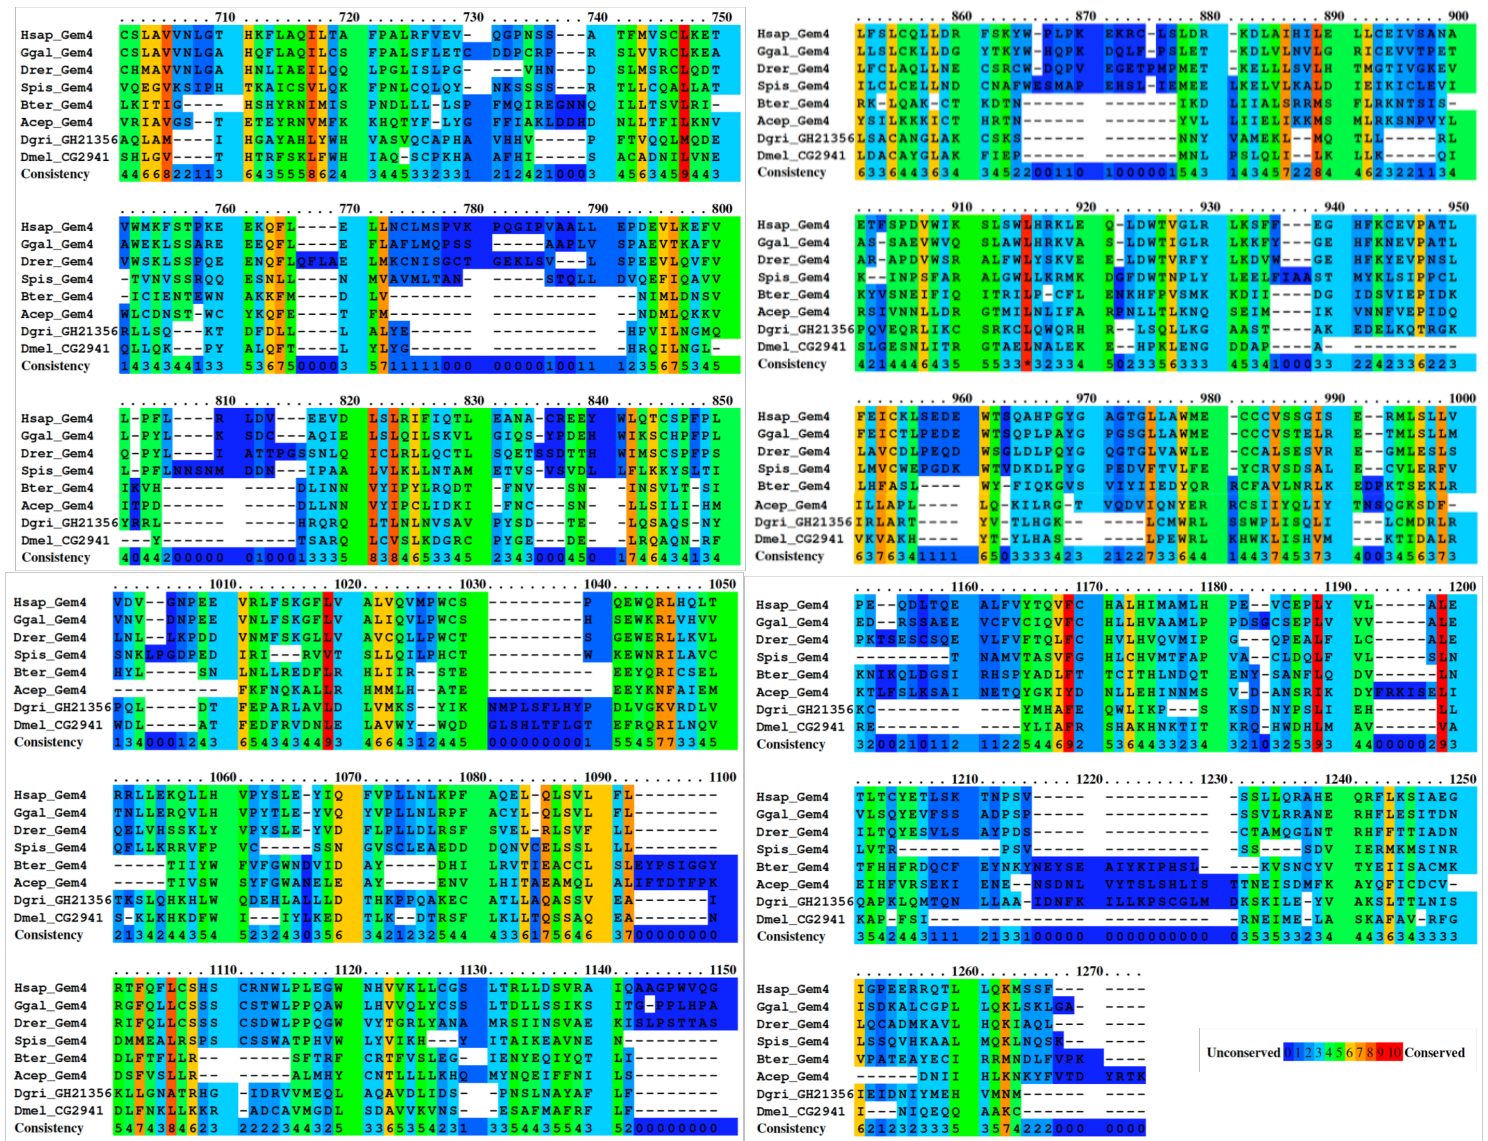

**Figure S1.** Amino acid alignment of Gemin4 orthologs from a variety of species, including: *Homo sapiens* (Hsap), *Gallus gallus* (Ggal), *Danio rerio* (Drer), *Stylophora pistillata* (Spis), *Bombus terrestris* (Bter), *Atta cephalotes* (Acep), *Drosophila grimshawi* (Dgri), and *Drosophila melanogaster* (Dmel). (A) Alignment of Dmel\_CG2941 with residues 1-700 of metazoan Gemin4. (B) Alignment of Dmel\_CG2941 with Gemin4 residues 701-1274. (A-B) The degree of conservation in the sequence is indicated by a coloration spectrum running from blue to red, with blue indicating regions of low conservation and red highlighting those that are highly conserved. (C) Predicted secondary structure alignment of Dmel\_CG2941 with residues 1-700 of metazoan Gemin4. (D) Secondary structure alignment of Dmel\_CG2941 with Gemin4 residues 701-1274. (C-D) Regions predicted to adopt an alpha-helical (red) vs. beta-stranded (blue) secondary structure are shaded accordingly.



C

|              |             |               |                 |             |                 |              |                  |                |                |              |                  |
|--------------|-------------|---------------|-----------------|-------------|-----------------|--------------|------------------|----------------|----------------|--------------|------------------|
| Hsap_Gem4    | .....10     | .....20       | .....30         | .....40     | .....50         | Hsap_Gem4    | .....360         | .....370       | .....380       | .....390     | .....400         |
| Ggal_Gem4    | -----MD     | LGPLNICEEM    | TIHGGFLIA       | EQLFHPKALA  | ELTKS----       | Ggal_Gem4    | AEKVKEAERD       | VSLTSLAKLP     | SETIPVGCFF     | LH-----      | HL LREWGE----    |
| Drer_Gem4    | -----MD     | VAPWGVCEET    | AILHGGFLIA      | SRLLQPRPLR  | ELLKA-----      | Drer_Gem4    | DEKVKEAERT       | MSFASIAKLS     | REELIAGLDF     | LH-----      | CL MRWANG----    |
| Spis_Gem4    | -----MD     | QESWLSCEKT    | AVLQGGFLIA      | SOICQPEPLS  | SLRKE-----      | Spis_Gem4    | TEAIRREARRD      | LAAAI-----     | AETKPCGMTF     | TQAMQFFLEV   | ICSW-----        |
| Bter_Gem4    | -----MD     | -----MNYCPET  | VIVNSAFFLIA     | ESL-----    | QBLT KLEKG----  | Bter_Gem4    | -----RNHKKARID   | VVVSGETC       | ACISFLCQGMIN   | DM-----      | SE VSHWIGGNVN    |
| Acep_Gem4    | -----MD     | -----KLNEFY   | KKIQMYLMKM      | SQEC-----   | GELK LLTSCITTEN | Acep_Gem4    | LTQVKKEVDGN      | IYLSWAEADD     | QENNMISLQ      | -----        | RS IGIECY----    |
| Dgri_GH21356 | -----MD     | -----LILELP   | KQVQKFLFKK      | EQEY-----   | GOLK FILSQAIDET | Dgri_GH21356 | LNQIKKEVDCL      | EEMDMAEVDD     | NENNMISLQ      | -----        | RA IIEECY----    |
| Dmel_CG2941  | MI-----TAK  | LRPLNNCEVP    | NQRIEFTNY       | HQHT-----   | KKLN SLVYFG--GN | Dmel_CG2941  | QRLIVLCISVD      | TYMANCELDS     | GG--LLFBLQ     | -----        | AH ISNQCQ----    |
|              |             | KHPLDNCQLF    | VQLKKLFHDY      | NEKV-----   | QRLK DMIYWS--GN |              | QRIFQLVSVSD      | TYMYNHEMK      | KS--ALYNCO     | -----        | SL ICROTA----    |
|              |             |               |                 |             |                 |              |                  |                |                |              |                  |
| Hsap_Gem4    | .....60     | .....70       | .....80         | .....90     | .....100        | Hsap_Gem4    | .....410         | .....420       | .....430       | .....440     | .....450         |
| Ggal_Gem4    | -----MD     | WERVGRPIVE    | ALREIS--A       | A-----A     | HSQPFNWK--      | Ggal_Gem4    | -----ELQAVLRSS   | -----QGTSY     | DSY--RLCD      | SLTSFSONATLY | LNRTSLSKED       |
| Drer_Gem4    | -----MD     | WPIVGPPIITD   | ALREIGA-RC      | P-----S     | PRQHGLW--       | Drer_Gem4    | -----ELRGVLNSS   | -----ENQCY     | ESY--WLHLL     | TLPTFRKSLVCF | SETGDLSEDE       |
| Spis_Gem4    | -----MD     | WDRIGPPIVN    | AVKEIGESHL      | K-----D     | TKDRHWNK--      | Spis_Gem4    | -----VYMGMLKTP   | -----SNEPH     | ATVMRLKDSL     | DRVLASIEEP   | SHAKDL-VGN       |
| Bter_Gem4    | -----MD     | GTRAVQIVSR    | AIKEITG--E      | LLVDDKGRLL  | PVEVETLE        | Bter_Gem4    | -----NNSMGELDSS  | SWLPLRNM       | QLY--FLAWFI    | ESCTDDGILH   | KQAEKLTQGL       |
| Acep_Gem4    | -----MD     | NNHT--EHICK   | SMNNIFKTYN      | IP--IEE--   | -----KTSIN--    | Acep_Gem4    | -----YFIDYVSN    | N--EISEN       | THLIECLQQL     | CKSD----     | -----F           |
| Dgri_GH21356 | EQHT--KNLSQ | SCFV--NELLE   | ALTNIIKQFN      | IYDIRMFIYEN | DSSKPCINI--     | Dgri_GH21356 | -----CFIEFMKN    | E--LLSTN       | DHLLHCLEQL     | VGPKK----    | -----F           |
| Dmel_CG2941  | DHHT--AKICD | QVTDLLVEHD    | LT--IQPP--E     | TMDPCA----- | -----MNHLEGL    | Dmel_CG2941  | ELVPLLVLED       | S--FLKTH       | -----CLRSML    | DNFTQGA--    | -----QSF         |
|              |             |               |                 |             |                 |              |                  |                |                |              |                  |
| Hsap_Gem4    | .....110    | .....120      | .....130        | .....140    | .....150        | Hsap_Gem4    | .....460         | .....470       | .....480       | .....490     | .....500         |
| Ggal_Gem4    | -----MD     | WAKVLPQHPV    | TESDTE          | TRWQEDLFF   | SVGNMIP-TI      | Ggal_Gem4    | -----QVVSSELA    | -----ECVR      | DPLRKSSTVL     | KNRALE--     | -----T           |
| Drer_Gem4    | -----MD     | WAKVLPQHPV    | AAS--LD         | REWKEDAF    | SVGAMIP-DV      | Drer_Gem4    | -----MRVALELA    | -----QTID      | DPLKEISTTQ     | KSKDLE--     | -----T           |
| Spis_Gem4    | -----MD     | WSKVLDVRN     | -----SKDIT      | TRNKEDPL    | DVQNSLP-DI      | Spis_Gem4    | -----GQFLDNLR    | -----VSLK      | GLLGSLSTPV     | PESSAL--     | -----T           |
| Bter_Gem4    | -----MD     | PASVVKAYG     | -----GLFND      | DS--REEEYF  | DSFPPLP-GM      | Bter_Gem4    | -----AQVVKKHAT   | AELEWIDGFK     | GELIGFEES      | CEEFESSP     | GSVDLLLFQ        |
| Acep_Gem4    | -----MD     | YKYLLENT--    | -----NFENO      | ERLAEDLVSG  | HIVHMCPL        | Acep_Gem4    | -----KQSSPALS    | -----SELK      | CAIHS          | -----        | -----GK          |
| Dgri_GH21356 | LYNYLVNLSAN | -----NFQSO    | SLTTEDLMIG      | HIVHMCPL    | PLSFYLLIQILW    | Dgri_GH21356 | -----EESVLS--    | -----EELC      | HSIN           | -----        | -----GK          |
| Dmel_CG2941  | LYNYLVNLSAN | -----NFQSO    | SLTTEDLMIG      | HIVHMCPL    | PLSFYLLIQILW    | Dmel_CG2941  | -----EESVLS--    | -----EELC      | HSIN           | -----        | -----GK          |
|              |             |               |                 |             |                 |              |                  |                |                |              |                  |
| Hsap_Gem4    | .....160    | .....170      | .....180        | .....190    | .....200        | Hsap_Gem4    | .....510         | .....520       | .....530       | .....540     | .....550         |
| Ggal_Gem4    | -----MD     | SLEASGLFIQ    | LLMALPTTIC      | HAELERFLEN  | VTVDSAP--D      | Ggal_Gem4    | -----DITASTA--   | NAVIQKMDR      | HMEVCYIPAS     | ERRWAFSD-E   | NVACLGSNRA       |
| Drer_Gem4    | -----MD     | ALGAARLEPAQ   | LLMALPTTIC      | HAELERFLEN  | VTVDSAP--D      | Drer_Gem4    | -----SLSSSVA--   | NTIIEQKLQR     | HMEVCYIPAS     | ERRWAFSD-E   | NVACLGSNRA       |
| Spis_Gem4    | -----MD     | SMSFSSIIYVE   | LLMGFPQSEA      | CEELKLLVDH  | VTSSSSEA-D      | Spis_Gem4    | -----ETAKMC--    | VTILDHNLG      | FEGGLRPLAS     | KESQDFNEAN   | WICQLERNAS       |
| Bter_Gem4    | -----MD     | VGVNNEELLVE   | CLCGFDGYDT      | TSLLIEDIHK  | LQEPSSSE-D      | Bter_Gem4    | -----ESTEEQPHFY  | LQRVNNRLEG     | YKECFDWLLS     | TEEHGSDS-D   | WLECMRHHAV       |
| Acep_Gem4    | -----MD     | SLEYEEVLIE    | SLLMPLDLDC      | TEVVKVTIRC  | IRLRFPOR-L      | Acep_Gem4    | -----KELMR--     | -----E--LNC    | RYKENDR-T      | VLDPIYDNRS   | -----            |
| Dgri_GH21356 | CKGLHQQLLE  | LIACSPHWLA    | SOYFDCDNDT      | LAHQVLRN-K  | RHTFLPLICGA     | Dgri_GH21356 | -----LDDMK--     | -----E--LNC    | RYKENDR-T      | VLDPIYDNRS   | -----            |
| Dmel_CG2941  | NCCLMPELEE  | FLAGGPRWLT    | IQYFEAFNEA      | LS--VINSD   | YETFLPLISAA     | Dmel_CG2941  | -----EQLHAA      | LNE--LIQ       | -----RSTCFGNDE | CVESMAKHVK   | -----            |
|              |             |               |                 |             |                 |              |                  |                |                |              |                  |
| Hsap_Gem4    | .....210    | .....220      | .....230        | .....240    | .....250        | Hsap_Gem4    | .....560         | .....570       | .....580       | .....590     | .....600         |
| Ggal_Gem4    | -----MD     | LDVWWEVVMX    | KGHPQDPLLS      | QFSAMA--HK  | YLPALDEFPH      | Ggal_Gem4    | -----LREPH--     | LV--LRLLETV    | -----DV        | -----STA     | -----DRAIPESQI   |
| Drer_Gem4    | -----MD     | LDVWWEVVMX    | VRDEPDSVT       | AFSSLVREHG  | CECALDDGLQ      | Drer_Gem4    | -----LQKKE--     | LV--LKLLETV    | -----NF        | -----STA     | -----EDREA-QEMQ  |
| Spis_Gem4    | -----MD     | LEVWWEVVMX    | KRGCEADLDQ      | LFTAQ--E    | SLSTTEPSPO      | Spis_Gem4    | -----VFQTKD--    | LL--MTLISTLT   | -----HK        | -----QS      | -----DAD--VDRC   |
| Bter_Gem4    | -----MD     | LLVRSFPHRA    | SVHECNKING      | TCCAK--SC   | SLILLEGVHE      | Bter_Gem4    | -----EISEAQ--    | HA--LKMIDIIYMO | -----RQS       | -----LCA     | -----DNTCSDTYV   |
| Acep_Gem4    | -----MD     | IYTKFSQLEK    | CSVQSKNVEE      | SVQNLMSFE   | ES--PLLTN       | Acep_Gem4    | -----LEKKKDCLT   | LEYLTPVITQ     | -----S         | -----        | -----EEDPKF      |
| Dgri_GH21356 | LSAVTKSICY  | -----GNASNAFL | MDNAMRLQR       | NL--LD--TE  | ERQSSIGSRA      | Dgri_GH21356 | -----LLNVQDSSTV  | LEYFYHYV-E     | -----HM        | -----        | -----NNYEENY     |
| Dmel_CG2941  | LRAAGRAIVN  | CNLP--ENKQL   | LROIACMEHR      | HT--LD--SK  | QRLHTLPRPS      | Dmel_CG2941  | -----LLTSSHAKLI  | LDHLEVLV       | QA--QQRQ       | -----LADFE   | -----EDELDDNNEIY |
|              |             |               |                 |             |                 |              |                  |                |                |              |                  |
| Hsap_Gem4    | .....260    | .....270      | .....280        | .....290    | .....300        | Hsap_Gem4    | .....610         | .....620       | .....630       | .....640     | .....650         |
| Ggal_Gem4    | -----MD     | ACPTT--       | ELAMLLRGLT      | QIQSR--IL   | G--PGRKC        | Ggal_Gem4    | -----QVVIHILILEC | YADLSLPCKN     | KVLAGILBSW     | GRKGLSEK     | -----LAV         |
| Drer_Gem4    | -----MD     | SLNGSPAA--    | LLVVLMEGLK      | QTYGS--IA   | S--PRMKC        | Drer_Gem4    | -----MEVTKAIVEC  | YSELSTDRN      | EVISGVLEAW     | GGPGLSLNL    | -----QVV         |
| Spis_Gem4    | -----MD     | S-PS--        | MYNLFPEGLR      | KIKER--AT   | S--SELVCY       | Spis_Gem4    | -----KRLKDVIVDI  | FHHLPLSDRN     | ATLSBELL--M    | SKKGLHGLFP   | -----CSN         |
| Bter_Gem4    | -----MD     | ALDDMM--KN    | VIDPVFTEVT      | HLNFE--LD   | SSNTEGKIC       | Bter_Gem4    | -----KELKEILLTL  | HNNLPHPSSE     | QIIEYAFIMS     | SSLSPEND     | -----SIFHPWFMS   |
| Acep_Gem4    | -----MD     | DLKK--CE      | RHGILLKKLI      | CTIRK--CL   | EN--KSKKIL      | Acep_Gem4    | -----S--YTLVIKI  | LS--CS--V      | TDIYIITMY      | LTKYDGRKSV   | -----L           |
| Dgri_GH21356 | ARNR--      | YL            | QHGILLKMDL      | RYIRM--CM   | RY--TKNFP       | Dgri_GH21356 | -----Q--YTLVLIK  | LT--KQ--L      | SDMYRIVILY     | TIQHFHDNR    | -----N           |
| Dmel_CG2941  | TRKI--      | YLAAMDHIL     | EVLLY--TL       | ND--PLKR    | -----EKPNCFA    | Dmel_CG2941  | -----GKLLSQVLMR  | IY--MAC--SDP   | MEKLLQLCYR     | DKLQLLHY     | -----NF          |
|              |             |               |                 |             |                 |              |                  |                |                |              |                  |
| Hsap_Gem4    | .....310    | .....320      | .....330        | .....340    | .....350        | Hsap_Gem4    | .....660         | .....670       | .....680       | .....690     | .....700         |
| Ggal_Gem4    | -----MD     | VEANT--       | -----EDDPQ--E   | VSAIVYLDKL  | ATVIVSWNSD      | Ggal_Gem4    | -----VEGQFQEDL   | NTIFNQITQS     | -----ASEGGLAK  | AVASVARLVI   | VHPFVTVKRM       |
| Drer_Gem4    | -----MD     | VFTET--       | -----EPQGG--P   | LPVAEYLAHV  | SSVSLWSSD       | Drer_Gem4    | -----MEGQFQEDL   | NVTFNQITQS     | -----VSGELTR   | AVASVARLVI   | VHPFVTVKRM       |
| Spis_Gem4    | -----MD     | TSYI--        | -----SSV--T--D  | LPKEMLQOI   | SRAVNLKRN       | Spis_Gem4    | -----TKGFSDEL    | NLAFNSIQS      | -----GAKSSIDA  | AVTAVARLVI   | QNEEATLRRC       |
| Bter_Gem4    | -----MD     | CKH--         | -----QFFTMEEDKV | NDYRKTEGK   | SEHNKETEAF      | Bter_Gem4    | -----ETVNFQLEL   | VLTFNKVIDC     | DIADIGGLKS     | STKDLTKAAL   | ISVPLTKKA        |
| Acep_Gem4    | -----MD     | ITFG--        | -----EALVKCES   | TLIENTISTL  | NQ--            | Acep_Gem4    | -----ECP--HTDEA  | FHEFIMNNT      | -----NLQST     | NKTVLLFL     | LNKPMVLI         |
| Dgri_GH21356 | YVY--       | RTDYFCKLP     | DKVKSIIATL      | DQE--       | -----LVNLL      | Dgri_GH21356 | -----TFI--NSENH  | FKTYIESNT      | -----NISELO    | EFRIILIFVM   | LNKPMVLI         |
| Dmel_CG2941  | YYSQ--      | ITEDISDSNS    | SDPMPDLRHF      | AQI--       | -----LMDV       | Dmel_CG2941  | -----KAPDHRERR   | IRFFNQL--      | -----DYNKRF    | PITEFLVLCP   | ENARQTWIDF       |

Fig. S1 (cont'd)

|              |  |            |            |            |            |            |             |            |            |             |              |            |            |            |            |            |            |            |            |    |      |   |
|--------------|--|------------|------------|------------|------------|------------|-------------|------------|------------|-------------|--------------|------------|------------|------------|------------|------------|------------|------------|------------|----|------|---|
|              |  | 710        | 720        | 730        | 740        | 750        |             |            | 1060       | 1070        | 1080         | 1090       | 1100       |            |            |            |            |            |            |    |      |   |
| Hsap_Gem4    |  | CSLAVVNLGT | HKFLAQILTA | FPALRFVVE  | QDPNRS     | A          | TPMVSCILKET |            | Hsap_Gem4  | RRLLRQQLLH  | VPYSLR       | YIQ        | PVPLNLNPKP | AQEL       | QLSVL      | FL         | ----       |            |            |    |      |   |
| Ggal_Gem4    |  | CSLAVVNLGT | HQFLAQILCS | FPALSELETC | DDPCR      | R          | SLVVRCLKEA  |            | Ggal_Gem4  | TNLLRRQVLH  | VPYTLR       | YVQ        | YVPLNLNPKP | ACYL       | QLSVL      | FL         | ----       |            |            |    |      |   |
| Drer_Gem4    |  | CHMAVVNLGA | HNLAIEILQQ | LPGLISLPG  | ----       | VHN        | D           | SLMRSCLQDT |            | Drer_Gem4   | QELVHSKSLY   | VPYSLR     | YVD        | PLPLDLNLR  | SVEI       | RLSVF      | LI         | ----       |            |    |      |   |
| Spis_Gem4    |  | VOEGVKSIPH | TKAICSVLQK | FPNMLCQLQY | NKSSSS     | R          | TLLCQALLAT  |            | Spis_Gem4  | QFLILRRRVFP | VC           | ----       | SSN        | GVSCLEAEDD | DQNVCLSLSL | LI         | ----       |            |            |    |      |   |
| Bter_Gem4    |  | LKITITG    | ----       | BSHYRNIMSS | PNDLIL     | LSF        | FMQIREGNQ   | ILTSVLRI   |            | Bter_Gem4   | ----         | TIYIW      | YVFGWNDVID | AV         | ----       | DHI        | LRVTIACCL  | SLEYPISGG  | F          |    |      |   |
| Accep_Gem4   |  | VRIAVGS    | ----       | ETERYRVMFK | KHQTYY     | LYG        | FFIAKLDDHD  | ILLTFILKNV |            | Accep_Gem4  | ----         | TIYSW      | YVFGWANELE | AV         | ----       | ENV        | LHITAEAMQL | ALTFIDTFPK |            |    |      |   |
| Dgri_GH21356 |  | AQLAM      | ----       | HGAYAHLYWH | VASVQCAPHA | VHHV       | ----        | P          | FTVQQLMQDE |             | Dgri_GH21356 | KSLQ       | RRKHLH     | QDEHALLLD  | THKPPQAKEC | ATLLAQASSV | EA         | ----       | I          |    |      |   |
| Dmel_CG2941  |  | SHLGV      | ----       | HTRFSKLFWH | IAQ        | SCP        | KHA         | AFHI       | ----       | Dmel_CG2941 | S            | KLKHKDFW   | T          | ----       | LYLKE      | TLK        | ----       | DTRSF      | LKLLTQSSAQ | EA | ---- | N |
|              |  | 760        | 770        | 780        | 790        | 800        |             |            |            | 1110        | 1120         | 1130       | 1140       | 1150       |            |            |            |            |            |    |      |   |
| Hsap_Gem4    |  | VMMRFSTERE | EKQPL      | ----       | E          | LLNCIMSPVK | PQGI        | VAALL      | E          | FDDEVLEKPV  |              |            |            |            |            |            |            |            |            |    |      |   |
| Ggal_Gem4    |  | AMEKISSARE | EKQPL      | ----       | E          | FLAFIMQPSF | ----        | AAPLV      | S          | PAEVRTAFV   |              |            |            |            |            |            |            |            |            |    |      |   |
| Drer_Gem4    |  | VMSKLSSPQE | ENQPLQPLAE | LMKCNISGCT | GKELSV     | ----       | S           | PSBEVLQGVF |            |             |              |            |            |            |            |            |            |            |            |    |      |   |
| Spis_Gem4    |  | RVNVSSRQQ  | ESNLL      | ----       | N          | VMVAMITAN  | ----        | STQLL      | D          | VQEFIQAVV   |              |            |            |            |            |            |            |            |            |    |      |   |
| Bter_Gem4    |  | ICIENTENWE | AKKFM      | ----       | D          | LV         | ----        | NIMIDNSI   |            |             |              |            |            |            |            |            |            |            |            |    |      |   |
| Accep_Gem4   |  | WICDNS     | ----       | KC         | YKQPE      | ----       | T           | FM         | ----       | NMDLQKKV    |              |            |            |            |            |            |            |            |            |    |      |   |
| Dgri_GH21356 |  | RLLSQ      | ----       | KT         | PDFLL      | ----       | L           | ALYE       | ----       | HPVILNGMQ   |              |            |            |            |            |            |            |            |            |    |      |   |
| Dmel_CG2941  |  | QLLQK      | ----       | PY         | ALQET      | ----       | L           | YLYG       | ----       | HRQLNLGI    |              |            |            |            |            |            |            |            |            |    |      |   |
|              |  | 810        | 820        | 830        | 840        | 850        |             |            |            | 1160        | 1170         | 1180       | 1190       | 1200       |            |            |            |            |            |    |      |   |
| Hsap_Gem4    |  | R          | PFH        | ----       | R          | LDV        | ----        | EEVD       | LSLRIFIQTL | EANA        | CREXY        | WLOTCSPFPL |            |            |            |            |            |            |            |    |      |   |
| Ggal_Gem4    |  | R          | PYH        | ----       | K          | SDC        | ----        | AQIE       | LSLQILSKVL | GLQS        | YPDEH        | WIKSCHFFPL |            |            |            |            |            |            |            |    |      |   |
| Drer_Gem4    |  | R          | PYH        | ----       | I          | ATTPGSSNLQ | ICGLRLQCTL  | QETSSDTH   | WMSCSPPFRS |             |              |            |            |            |            |            |            |            |            |    |      |   |
| Spis_Gem4    |  | R          | PFLNNSNM   | DD         | ----       | IPAA       | LVKLINTAM   | ETVS       | VSMDL      | FLKKYSLTI   |              |            |            |            |            |            |            |            |            |    |      |   |
| Bter_Gem4    |  | IKVH       | ----       | DLIIN      | VYTFYLRQDT | FNV        | ----        | SN         | ----       | INSVL       | SI           |            |            |            |            |            |            |            |            |    |      |   |
| Accep_Gem4   |  | ITPD       | ----       | DLIIN      | VYTFPCIDKI | LN         | ----        | SN         | ----       | LSILI       | NM           |            |            |            |            |            |            |            |            |    |      |   |
| Dgri_GH21356 |  | YRRV       | ----       | HRQRQ      | LTNLNVSAV  | PYSD       | ----        | TE         | ----       | LQSAQS      | NY           |            |            |            |            |            |            |            |            |    |      |   |
| Dmel_CG2941  |  | ----       | ----       | TSARQ      | LCVSLKDGR  | PYGE       | ----        | DE         | ----       | LRQAQV      | RF           |            |            |            |            |            |            |            |            |    |      |   |
|              |  | 860        | 870        | 880        | 890        | 900        |             |            |            | 1210        | 1220         | 1230       | 1240       | 1250       |            |            |            |            |            |    |      |   |
| Hsap_Gem4    |  | LFSLCQLLDG | FSKYW      | PLPK       | ----       | EKKR       | LSLDR       | ----       | KDLAIRLE   | LLCEIVSANA  |              |            |            |            |            |            |            |            |            |    |      |   |
| Ggal_Gem4    |  | LLSLCQLLDG | YTKYW      | QPK        | ----       | QDLF       | PSLET       | ----       | KDLVNLVLG  | RICEVVTPT   |              |            |            |            |            |            |            |            |            |    |      |   |

**HELIX (H) STRAND (E)**



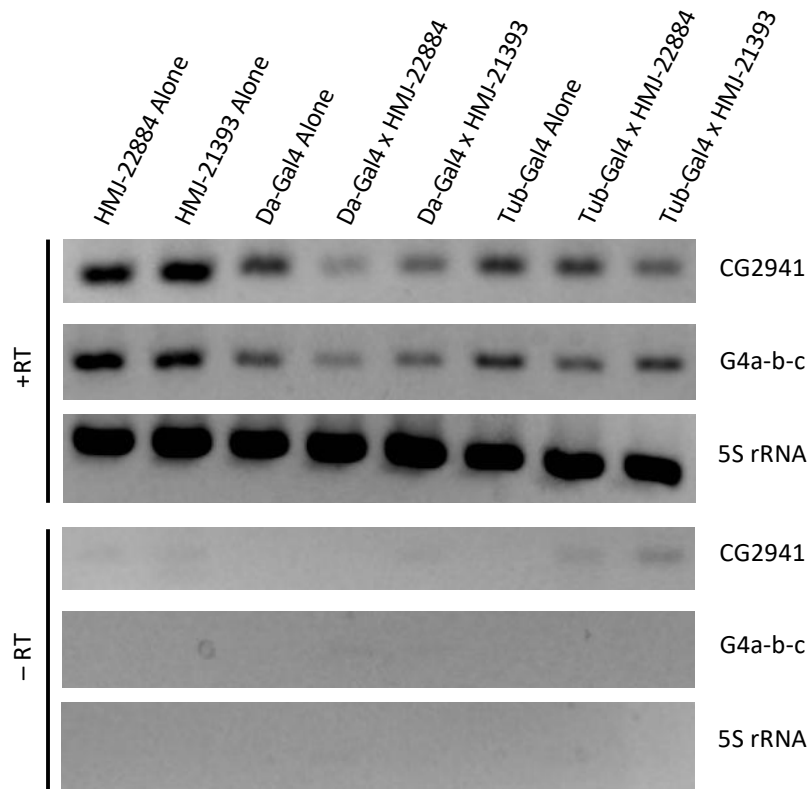

**Figure S2.** RT-PCR analysis of total RNA isolated from the early third instar larvae in Fig. 7C. Following reverse transcription, 35 cycles of PCR were performed using primers designed to analyze the expression of control RNA (5S rRNA), CG2941 mRNA only, or all three Gemin4 mRNA paralogs (G4a-b-c) are shown. Crosses as per Fig. 7.
